# Supplementary material
Source: Springer Nature journal article supplement (https://www.springermedizin.de/resource/supplementary/12967_2013_1881_MOESM8_ESM.pdf/9575000)

**A)** ■ u RCC + T cells, DI: 0.029  
 ■ 4+T RCC + T cells, DI: 0.059

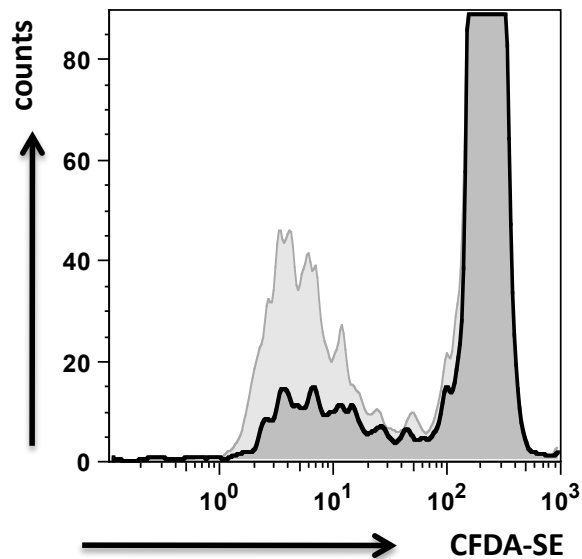

**B)**

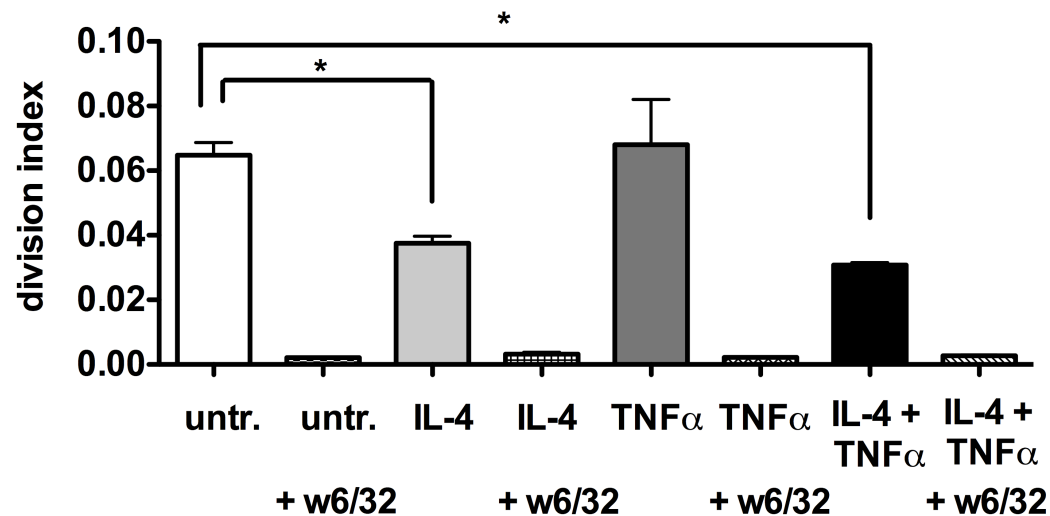

**C)**

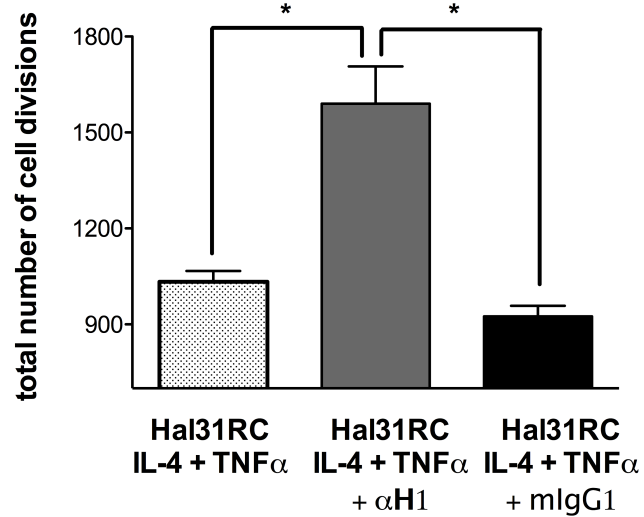

**D)**

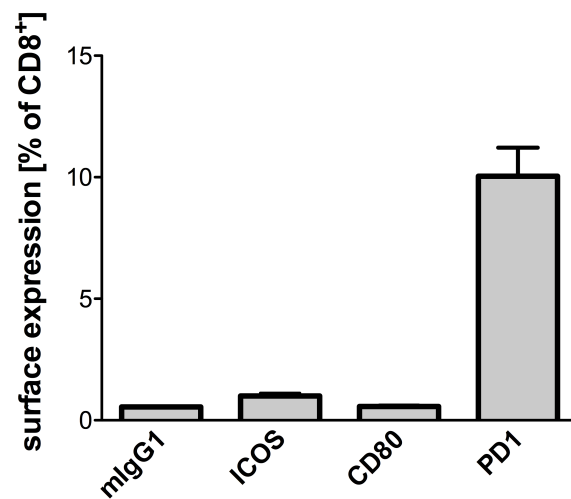

**E)**

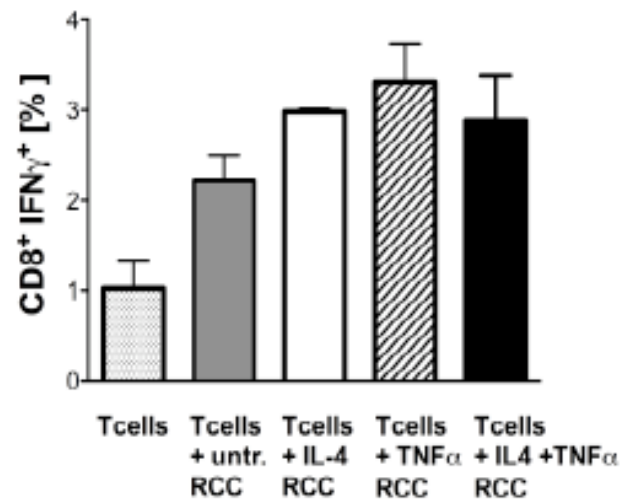

Supplement: MOESM8 [file 9575000]
